# Supplementary material
Source: PubMed Central journal article supplement (PMC9385672)
Supplement: 41467_2022_32547_MOESM2_ESM.pdf [file 41467_2022_32547_MOESM2_ESM.pdf]

## Peer Review File

---

Immunization with a RBD/Nucleocapsid fusion protein promotes neutralizing antibody-independent resistance to infection with the wild type and SARS-CoV-2 variants of concern

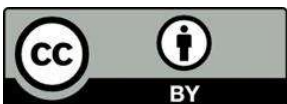

**Open Access** This file is licensed under a Creative Commons Attribution 4.0 International License, which permits use, sharing, adaptation, distribution and reproduction in any medium or format, as long as you give appropriate credit to the original author(s) and the source, provide a link to the Creative Commons license, and indicate if changes were made. In the cases where the authors are anonymous, such as is the case for the reports of anonymous peer reviewers, author attribution should be to 'Anonymous Referee' followed by a clear attribution to the source work. The images or other third party material in this file are included in the article's Creative Commons license, unless indicated otherwise in a credit line to the material. If material is not included in the article's Creative Commons license and your intended use is not permitted by statutory regulation or exceeds the permitted use, you will need to obtain permission directly from the copyright holder. To view a copy of this license, visit <http://creativecommons.org/licenses/by/4.0/>.

This manuscript has been previously reviewed at another journal that is not operating a transparent peer review scheme. This document only contains reviewer comments and rebuttal letters for versions considered at *Nature Communications*.

### **REVIEWERS' COMMENTS**

Reviewer #1 (Remarks to the Author):

The authors addressed the raised question and concerns by new data and by optimising the data presentation.

Concerning the last point on definition of the specific T cell epitopes I would suggest to include in the discussion section that this has to be further investigated.

Reviewer #2 (Remarks to the Author):

The authors have satisfactorily addressed my comments, and the paper is now greatly improved, and should be published in NATURE COMMUNICATIONS.

## REVIEWERS' COMMENTS

Reviewer #1 (Remarks to the Author):

The authors addressed the raised question and concerns by new data and by optimising the data presentation.

Concerning the last point on definition of the specific T cell epitopes I would suggest to include in the discussion section that this has to be further investigated.

It was included in the last paragraph of the discussion.

Reviewer #2 (Remarks to the Author):

The authors have satisfactorily addressed my comments, and the paper is now greatly improved, and should be published in NATURE COMMUNICATIONS.
